# Supplementary material
Source: PubMed Central journal article supplement (PMC9060638)
Supplement: NIHMS1801101-supplement-1.pdf [file NIHMS1801101-supplement-1.pdf]

## Median Contribution of Components to PASS Score

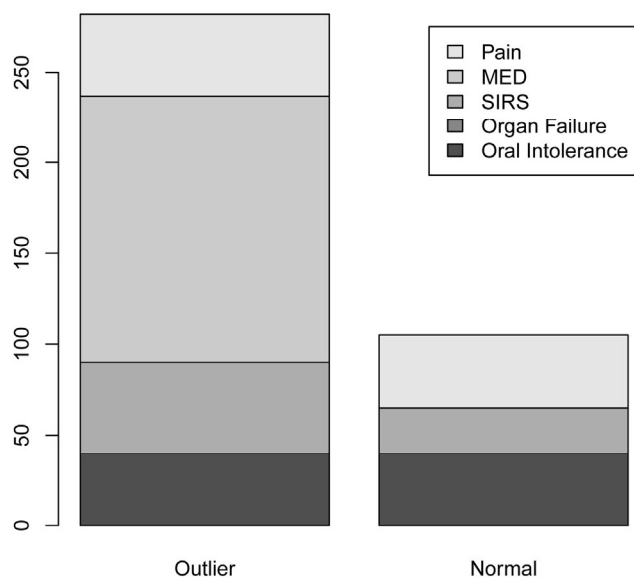

**Supplementary Figure 1.** Median contribution of PASS components to outlier and nonoutlier scores on admission.

**Supplementary Table 1.** PASS and mPASS-1 Values of the Total Cohort at Different Time Points by RAC Severity Groups

|                 | Admission |             | 24 hours |             | 48 hours |             | 72 hours |             | 7 days |            |
|-----------------|-----------|-------------|----------|-------------|----------|-------------|----------|-------------|--------|------------|
| <b>PASS</b>     |           |             |          |             |          |             |          |             |        |            |
| Severity        |           |             |          |             |          |             |          |             |        |            |
| Mild            | 115.0     | 90.0-141.7  | 85.0     | 55.0-125.0  | 56.7     | 25.0-100.0  | 40.0     | 5.0-75.0    | 10.0   | 0-40.0     |
| Moderate        | 140.0     | 110.0-167.5 | 130.0    | 95.0-175.0  | 111.7    | 75.0-161.7  | 98.3     | 55.0-138.3  | 50.0   | 25.0-100.0 |
| Severe          | 172.5     | 140.0-262.5 | 220.0    | 150.0-300.0 | 234.2    | 155.0-284.2 | 200.0    | 145.0-260.0 | 105.0  | 65.0-147.5 |
| <i>P</i> -value |           | < .001      |          | < .001      |          | < .001      |          | < .001      |        | < .001     |
| <b>mPASS-1</b>  |           |             |          |             |          |             |          |             |        |            |
| Severity        |           |             |          |             |          |             |          |             |        |            |
| Mild            | 100.0     | 80.0-115.0  | 75.0     | 45.0-100.0  | 50.0     | 25.0-85.0   | 35.0     | 5.0-65.0    | 5.0    | 0.0-40.0   |
| Moderate        | 130.0     | 100.0-145.0 | 120.0    | 85.0-150.0  | 100.0    | 65.0-130.0  | 85.0     | 50.0-125.0  | 50.0   | 25.0-85.0  |
| Severe          | 155.0     | 132.5-247.5 | 190.0    | 135.0-282.5 | 225.0    | 145.0-280.0 | 187.5    | 140.0-245.0 | 100.0  | 65.0-130.0 |
| <i>P</i> -value |           | < .001      |          | < .001      |          | < .001      |          | < .001      |        | < .001     |
| <b>mPASS-2</b>  |           |             |          |             |          |             |          |             |        |            |
| Severity        |           |             |          |             |          |             |          |             |        |            |
| Mild            | 120.0     | 90.0-145.0  | 90.0     | 60.0-130.0  | 65.0     | 30.0-105.0  | 40.0     | 5.0-80.0    | 10.0   | 0.0-40.0   |
| Moderate        | 140.0     | 115.0-165.0 | 135.0    | 100.0-175.0 | 115.0    | 75.0-155.0  | 95.0     | 55.0-140.0  | 50.0   | 25.0-100.0 |
| Severe          | 170.0     | 140.0-255.0 | 205.0    | 150.0-302.5 | 240.0    | 160.0-280.0 | 200.0    | 150.0-257.5 | 102.5  | 65.0-150.0 |
| <i>P</i> -value |           | < .001      |          | < .001      |          | < .001      |          | < .001      |        | < .001     |
| <b>mPASS-3</b>  |           |             |          |             |          |             |          |             |        |            |
| Severity        |           |             |          |             |          |             |          |             |        |            |
| Mild            | 115.0     | 90.0-140.0  | 85.0     | 55.0-115.0  | 60.0     | 25.0-95.0   | 40.0     | 5.0-75.0    | 10.0   | 0.0-40.0   |
| Moderate        | 135.0     | 110.0-165.0 | 125.0    | 95.0-160.0  | 110.0    | 75.0-145.0  | 90.0     | 55.0-130.0  | 50.0   | 25.0-95.0  |
| Severe          | 165.0     | 140.0-255.0 | 205.0    | 150.0-285.0 | 230.0    | 152.5-280.0 | 200.0    | 145.0-247.5 | 102.5  | 65.0-135.0 |
| <i>P</i> -value |           | < .001      |          | < .001      |          | < .001      |          | < .001      |        | < .001     |
| <b>mPASS-4</b>  |           |             |          |             |          |             |          |             |        |            |
| Severity        |           |             |          |             |          |             |          |             |        |            |
| Mild            | 115.0     | 90.0-140.0  | 85.0     | 55.0-115.0  | 60.0     | 25.0-95.0   | 40.0     | 5.0-75.0    | 10.0   | 0.0-40.0   |
| Moderate        | 135.0     | 110.0-165.0 | 125.0    | 95.0-165.0  | 110.0    | 75.0-150.0  | 95.0     | 55.0-135.0  | 50.0   | 25.0-95.0  |
| Severe          | 165.0     | 140.0-255.0 | 207.5    | 150.0-285.0 | 232.5    | 152.2-280.0 | 200.0    | 145.0-247.5 | 105.0  | 65.0-135.0 |
| <i>P</i> -value |           | < .001      |          | < .001      |          | < .001      |          | < .001      |        | < .001     |

Note: *P*-value testing for a significant difference between RAC groups from Kruskal-Wallis tests.

Note: Data are presented as median (IQR).

Note: Boldface *P* values indicate statistical significance.

IQR, Interquartile range; mPASS, modified Pancreatitis Activity Scoring System; PASS, Pancreatitis Activity Scoring System; RAC, Revised Atlanta Classification.

**Supplementary Table 2.** Comparison of Clinical Characteristics Between Subjects With Outlier Admission PASS Values vs Nonoutlier Admission PASS

|                                   | Nonoutlier (n = 1293) |           | Outlier (n = 100) |           | P-value          |
|-----------------------------------|-----------------------|-----------|-------------------|-----------|------------------|
| Age, y                            | 49.0                  | 34.0–64.0 | 44.5              | 36.0–53.0 | <b>.027</b>      |
| BMI, kg/m <sup>2</sup>            | 26.5                  | 23.2–30.6 | 26.5              | 23.0–32.4 | .551             |
| Charlson Comorbidity Index        | 1.0                   | 0–2.0     | 0                 | 0–1.0     | <b>.004</b>      |
| Male                              | 643                   | 49.73     | 71                | 71.00     | <b>&lt; .001</b> |
| Race                              |                       |           |                   |           | <b>&lt; .001</b> |
| Asian Indian                      | 298                   | 23.05     | 11                | 11.00     |                  |
| Black or African American         | 64                    | 4.95      | 8                 | 8.00      |                  |
| Hispanic or Latino                | 296                   | 22.89     | 3                 | 3.00      |                  |
| White or Caucasian (non-Hispanic) | 14                    | 1.08      | 0                 | 0.00      |                  |
| Other                             | 621                   | 48.03     | 78                | 78.00     |                  |
| Smoking                           | 273                   | 21.29     | 42                | 42.00     | <b>&lt; .001</b> |
| Alcohol                           | 473                   | 36.92     | 59                | 59.00     | <b>&lt; .001</b> |
| Etiology                          |                       |           |                   |           | <b>&lt; .001</b> |
| Gallstones                        | 611                   | 47.25     | 22                | 22.00     |                  |
| Alcoholic                         | 248                   | 19.18     | 43                | 43.00     |                  |
| Idiopathic                        | 210                   | 16.24     | 12                | 12.00     |                  |
| HTG                               | 61                    | 4.72      | 6                 | 6.00      |                  |
| Post-ERCP                         | 108                   | 8.35      | 13                | 13.00     |                  |
| Other                             | 55                    | 4.25      | 4                 | 4.00      |                  |
| RAC                               |                       |           |                   |           | <b>&lt; .001</b> |
| Mild                              | 908                   | 70.22     | 42                | 42.00     |                  |
| Moderate                          | 292                   | 22.58     | 23                | 23.00     |                  |
| Severe                            | 93                    | 7.19      | 35                | 35.00     |                  |
| Length of stay, d                 | 8.0                   | 5.0–13.0  | 10.0              | 5.0–23.5  | <b>.020</b>      |
| Length of stay, d                 |                       |           |                   |           | .887             |
| Short (0-2)                       | 90                    | 6.96      | 8                 | 8.00      |                  |
| Intermediate (3-6)                | 452                   | 34.96     | 36                | 36.00     |                  |
| Long (≥7)                         | 751                   | 58.08     | 56                | 56.00     |                  |
| Continent                         |                       |           |                   |           | <b>&lt; .001</b> |
| Europe                            | 325                   | 25.14     | 22                | 22.00     |                  |
| Asia                              | 292                   | 22.58     | 11                | 11.00     |                  |
| Latin America                     | 282                   | 21.81     | 1                 | 1.00      |                  |
| North America                     | 394                   | 30.47     | 66                | 66.00     |                  |

Note: Data are presented as number (%) or median (IQR).

Note: Boldface *P* values indicate statistical significance.

BMI, Body mass index; ERCP, endoscopic retrograde cholangiopancreatography; HTG, hypertriglyceridemia; IQR, interquartile range; PASS, Pancreatitis Activity Scoring System, RAC, Revised Atlanta Classification.

**Supplementary Table 3.** Comparison of Clinical Characteristics in the Subset of Subjects With Mild AP With Normal Range vs Outliers With Very High Admission PASS Values

|                            | Nonoutlier mild AP (n = 908) |           | Outlier mild AP (n = 42) |           | P-value          |
|----------------------------|------------------------------|-----------|--------------------------|-----------|------------------|
| Age, y                     | 50.0                         | 35.0–65.0 | 39.0                     | 32.0–50.0 | <b>.001</b>      |
| BMI, kg/m <sup>2</sup>     | 26.8                         | 23.2–30.7 | 26.0                     | 22.2–33.2 | .986             |
| Charlson Comorbidity Index | 1.0                          | 0.0–2.0   | 0.0                      | 0.0–1.0   | <b>.002</b>      |
| Male                       | 414                          | 45.59     | 24                       | 57.14     | .142             |
| Smoking                    | 191                          | 21.25     | 18                       | 42.86     | <b>.001</b>      |
| Alcohol                    | 316                          | 35.19     | 16                       | 38.10     | .700             |
| Etiology                   |                              |           |                          |           | .059             |
| Alcoholic                  | 139                          | 15.31     | 11                       | 26.19     |                  |
| Non-alcoholic              | 769                          | 84.69     | 31                       | 73.81     |                  |
| Length of stay, d          | 6.0                          | 4.0–10.0  | 5.0                      | 3.0–6.0   | <b>&lt; .001</b> |
| Length of stay, d          |                              |           |                          |           | <b>&lt; .001</b> |
| Short (0–2)                | 89                           | 9.80      | 8                        | 19.05     |                  |
| Intermediate (3–6)         | 387                          | 42.62     | 29                       | 69.05     |                  |
| Long (≥7)                  | 432                          | 47.58     | 5                        | 11.90     |                  |
| Continent                  |                              |           |                          |           | <b>&lt; .001</b> |
| Europe                     | 274                          | 30.18     | 0                        | 0.00      |                  |
| Asia                       | 125                          | 13.77     | 0                        | 0.00      |                  |
| Latin America              | 203                          | 22.36     | 0                        | 0.00      |                  |
| North America              | 306                          | 33.70     | 42                       | 100.00    |                  |

Note: Data are presented as number (%) or median (IQR).

Note: Boldface *P* values indicate statistical significance.

AP, Acute pancreatitis; BMI, body mass index; ERCP, endoscopic retrograde cholangiopancreatography; HTG, hypertriglyceridemia; IQR, interquartile range; PASS, Pancreatitis Activity Scoring System.

**Supplementary Table 4.** Comparison of Admission PASS in Patients With AP: Outliers vs Nonoutliers

|                  | Nonoutlier (n = 1293) |           | Outlier (n = 100) |           | P-value          |
|------------------|-----------------------|-----------|-------------------|-----------|------------------|
| Oral intolerance | 30.8                  | 24.2–39.9 | 12.2              | 10.0–14.3 | <b>&lt; .001</b> |
| Organ failure    | 0.0                   | 0.0–0.0   | 0.0               | 0.0–37.7  | <b>&lt; .001</b> |
| SIRS             | 23.8                  | 0.0–38.5  | 17.2              | 8.0–26.0  | <b>&lt; .001</b> |
| MED              | 0.0                   | 0.0–12.6  | 51.4              | 0.0–68.5  | <b>&lt; .001</b> |
| Pain             | 33.3                  | 25.0–42.9 | 13.6              | 10.6–16.8 | <b>&lt; .001</b> |

Note: Data are presented as median (IQR).

Note: Boldface *P* values indicate statistical significance.

AP, Acute pancreatitis; IQR, interquartile range; MED, morphine equivalent dose; PASS, Pancreatitis Activity Scoring System; SIRS, systemic inflammatory response syndrome.
